# Supplementary material for: Effects of Exposure to Indoor Fine Particulate Matter on Atopic Dermatitis in Children
Source: MDPI journal article supplement (doi:10.3390/ijerph182111509), 2021-11-01
Supplement: s1 [file s1]

## Supplemental materials

Supplementary Table S1. Summary of indoor and outdoor environments\*

|         |                                        | Total       |
|---------|----------------------------------------|-------------|
| Indoor  | Temperature (°C)                       | 25.5 ± 2.6  |
|         | RH (%)                                 | 47.2 ± 12.5 |
|         | Formaldehyde (ppb)                     | 13.6 ± 20.1 |
| Outdoor | Temperature (°C)                       | 14.0 ± 9.5  |
|         | RH (%)                                 | 67.9 ± 15.8 |
|         | PM <sub>2.5</sub> (µg/m <sup>3</sup> ) | 20.0 ± 11.8 |

\*Data are expressed as mean ± standard deviation; PM<sub>2.5</sub>, particulate matter with an aerodiameter less than 2.5 µm; RH, relative humidity

Supplementary Table S2. Percent changes of atopic dermatitis symptoms caused by PM<sub>2.5</sub> exposure

| Classification            | Subgroup | % change (95% confidence interval) † |
|---------------------------|----------|--------------------------------------|
| <b>All</b>                |          | 0.86 (-2.14, 3.96)                   |
| <b>Season</b>             | Spring   | 16.52 (6.48, 27.51)*                 |
|                           | Summer   | -3.70 (-13.34, 7.02)                 |
|                           | Fall     | -7.13 (-14.25, 0.58)                 |
|                           | Winter   | 12.60 (4.32, 21.53)*                 |
| <b>Indoor RH</b>          | <40%     | 1.65 (-3.86, 7.47)                   |
|                           | 40-60%   | -0.18 (-4.49, 4.32)                  |
|                           | ≥60%     | 6.99 (-5.2, 20.76)                   |
| <b>Indoor temperature</b> | <25.5°C  | 6.70 (2.33, 11.25)*                  |
|                           | ≥25.5°C  | -0.22 (-5.57, 5.44)                  |
| <b>Air purifier</b>       | (-)      | 14.94 (3.46, 27.70)*                 |
|                           | (+)      | -0.20 (-3.34, 3.03)                  |

†% change in AD symptoms per 10 µg/m<sup>3</sup> of PM<sub>2.5</sub> exposure; \*statistically significant with 95% confidence interval; RH, relative humidity.

Supplementary Table S3. Percent changes of atopic dermatitis symptoms caused by PM<sub>2.5</sub> exposure

| Classification                                        | Subgroup       | % change (95% confidence interval) † |
|-------------------------------------------------------|----------------|--------------------------------------|
| <b>All</b>                                            |                | 0.86 (-2.14, 3.96)                   |
| <b>Sex</b>                                            | Boys           | 4.91 (1.36, 8.59)*                   |
|                                                       | Girls          | -12.36 (-18.05, -6.28)*              |
| <b>Age</b>                                            | <6 yrs         | -2.71 (-6.08, 0.78)                  |
|                                                       | ≥6 yrs         | 11.96 (5.28, 19.05)*                 |
| <b>Family history of allergic diseases</b>            | (-)            | -2.16 (-6.68, 2.57)                  |
|                                                       | (+)            | 3.58 (-0.48, 7.82)                   |
| <b>Inhalant allergen sensitization</b>                | (-)            | -7.23 (-11.70, -2.54)                |
|                                                       | (+)            | 6.96 (1.88, 12.31)*                  |
| <b>SCORAD at enrollment</b>                           | <30.7 (median) | 1.73 (-2.33, 5.96)                   |
|                                                       | 30.7-40.9      | -0.80 (-7.30, 6.16)                  |
|                                                       | ≥40.9 (Q3)     | 4.16 (-2.45, 11.23)                  |
| <b>Inhalant allergen sensitization(+) PLUS SCORAD</b> | <30.7 (median) | 4.37 (-1.63, 10.74)                  |
|                                                       | ≥30.7 (median) | 15.68 (4.50, 28.06)*                 |
| <b>Air purifier</b>                                   | (-)            | 14.94 (3.46, 27.70)*                 |
|                                                       | (+)            | -0.20 (-3.34, 3.03)                  |

†% change in AD symptoms per 10 µg/m<sup>3</sup> of PM<sub>2.5</sub> exposure; \*statistically significant with 95% confidence interval; SCORAD, SCORing Atopic Dermatitis.

Supplementary Table S4. Indoor and outdoor PM<sub>2.5</sub> levels by season during study period

|               | <b>Indoor*</b> | <b>Outdoor*</b> | <b>Correlation<br/>coefficient</b> | <b><i>P</i> value *</b> |
|---------------|----------------|-----------------|------------------------------------|-------------------------|
| <b>Spring</b> | 28.0 ± 24.8    | 21.9 ± 10.4     | 0.22                               | -                       |
| <b>Summer</b> | 20.8 ± 15.0    | 17.1 ± 9.1      | 0.47                               | <.0001                  |
| <b>Fall</b>   | 22.9 ± 19.3    | 10.0 ± 16.0     | 0.42                               | <.0001                  |
| <b>Winter</b> | 47.1 ± 29.6    | 27.8 ± 14.6     | 0.32                               | <.0001                  |

\* Mean ± SD

Supplementary Table S5. Characteristics of AD patients and indoor environments by age group

|                                        | < 6 yrs<br>(47 patients) | ≥ 6 yrs<br>(17 patients) | P-value |
|----------------------------------------|--------------------------|--------------------------|---------|
| SCORAD at enrollment                   | 33.6 ± 14.1              | 34.3 ± 12.8              | 0.6147  |
| Inhalant allergen sensitization        | 41.9%                    | 71.4%                    | 0.2952  |
| BMI                                    | 16.7 ± 2.0               | 18.3 ± 3.2               | 0.0651  |
| PM <sub>2.5</sub> (µg/m <sup>3</sup> ) | 28.6 ± 24.4              | 29.1 ± 23.9              | 0.4362  |
| Indoor temperature (°C)                | 25.5 ± 2.7               | 25.3 ± 2.3               | < .0001 |
| Indoor RH (%)                          | 47.3 ± 1.9               | 46.9 ± 14.0              | 0.2148  |

SCORAD, SCORing Atopic Dermatitis; BMI, body mass index

Supplementary Fig. S1. Comparison of the PM<sub>2.5</sub> concentrations measured by SSP100 with those by Grimm PAS (PM<sub>2.5</sub>.prd indicates calibrated SSP100-PM<sub>2.5</sub> and PM<sub>2.5</sub>.grm Grimm PAS- PM<sub>2.5</sub>)

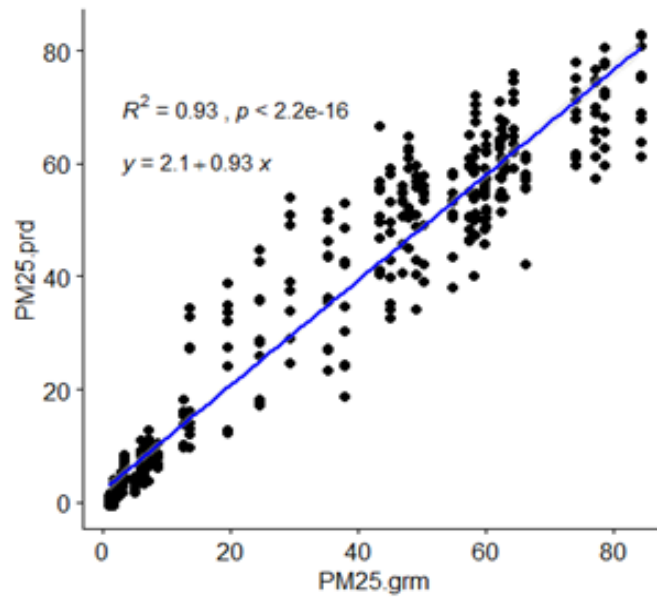

To assess indoor exposure to PM<sub>2.5</sub>, a laser-based light scattering sensor, SSP100 (SENKO, Osan, Korea), was used. To calibrate the SSP100-PM<sub>2.5</sub>, the assessment of the PM<sub>2.5</sub> sensor was performed in a room chamber with the size of 18 m<sup>3</sup> by comparing with Grimm portable aerosol spectrometer (PAS) 1.108 (Grimm Aerosol Technik GmbH & Co. KG, Ainring, Germany) which is widely used to assess the exposure to PM<sub>2.5</sub>. Ten SSP100-PM<sub>2.5</sub> sensors and a Grimm PAS were placed into the room chamber and a certain amount of aerosol was generated by an aerosol generator, PARTICLE GENERATOR 8026 (TSI, Shoreview, USA). After conducting the test for continuous two days, we collected 10-minute data from the 10 sensors and averaged them to an hour PM<sub>2.5</sub>. The hourly SSP100-PM<sub>2.5</sub> data were matched with the Grimm PAS-PM<sub>2.5</sub> and were stratified into four groups by concentration, 0~10, 10~20, 30~40, and > 40 µg/m<sup>3</sup> of PM<sub>2.5</sub>. The regression parameters between the SSP100-PM<sub>2.5</sub> and

Grimm PAS-PM<sub>2.5</sub> were obtained based on linear regression models for each group. Fig. S1 shows that the measured values by SSP100-PM<sub>2.5</sub> were very consistent with the reading value of Grimm PAS-PM<sub>2.5</sub>. The coefficient of determination ( $R^2$ ) between two measured values was validated higher than 0.93. We then calibrated all the real-time SSP100-PM<sub>2.5</sub> measured at households applying the four parameters for PM<sub>2.5</sub> level.

Supplementary Fig. S2. Correlations between atopic dermatitis (AD) symptoms and environmental variables.

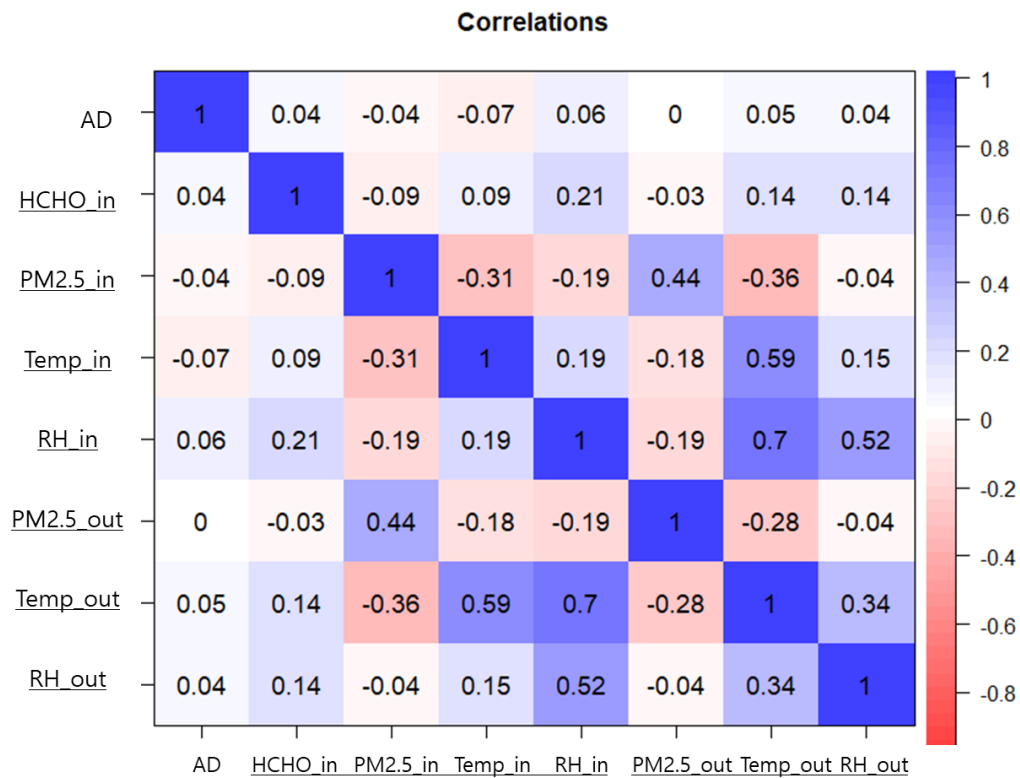

(AD: atopic dermatitis (AD) symptoms; HCHO\_in: indoor formaldehyde; PM2.5\_in: indoor PM<sub>2.5</sub>; Temp\_in: indoor temperature; RH\_in: indoor relative humidity; PM2.5\_out: outdoor PM<sub>2.5</sub>; Temp\_out: outdoor temperature; RH\_out: outdoor relative humidity)
